# Supplementary material
Source: Springer Nature journal article supplement (https://www.springerprofessional.de/resource/supplementary/40294_2012_10_MOESM9_ESM.pdf/11899528)

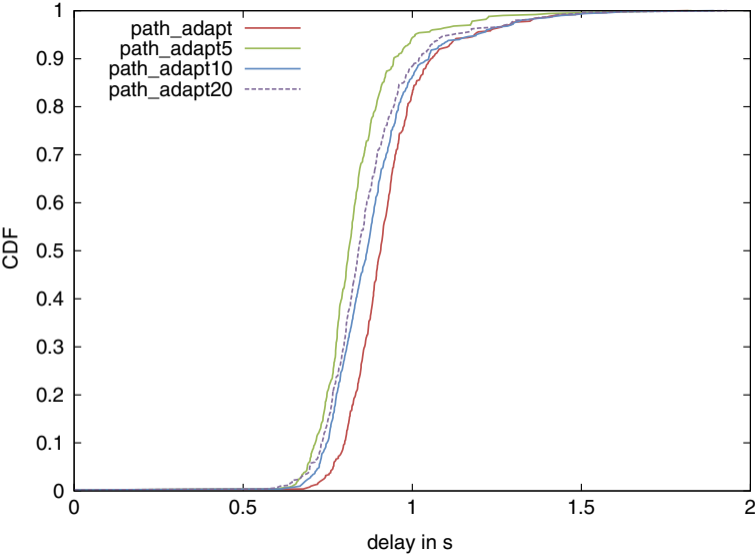

Supplement: MOESM9 [file 11899528]
